# Supplementary material for: Sodium storage in a promising MoS2–carbon anode: elucidating structural and interfacial transitions in the intercalation process and conversion reactions
Source: Royal Society of Chemistry journal article supplement (doi:10.1039/c8nr02620c), 2018-01-01
Supplement: c8nr02620c1.pdf [file c8nr02620c1.pdf]

## Supporting Information for Nanoscale

### Sodium Storage in Promising MoS<sub>2</sub>-Carbon Anode: Elucidating Structural and Interfacial Transition in Intercalation Process and Conversion Reactions

*Rutao Wang,<sup>a‡</sup> Shijie Wang,<sup>a‡</sup> Dongdong Jin,<sup>a</sup> Yabin Zhang,<sup>a</sup> Xinyong Tao,<sup>b</sup> Li Zhang<sup>\*a</sup>*

<sup>a</sup>Department of Mechanical and Automation Engineering, The Chinese University of Hong Kong, Shatin NT, Hong Kong SAR 999077, P. R. China.

<sup>b</sup>College of Materials Science and Engineering, Zhejiang University of Technology, Hangzhou 310014, P. R. China.

Email: lizhang@mae.cuhk.edu.hk

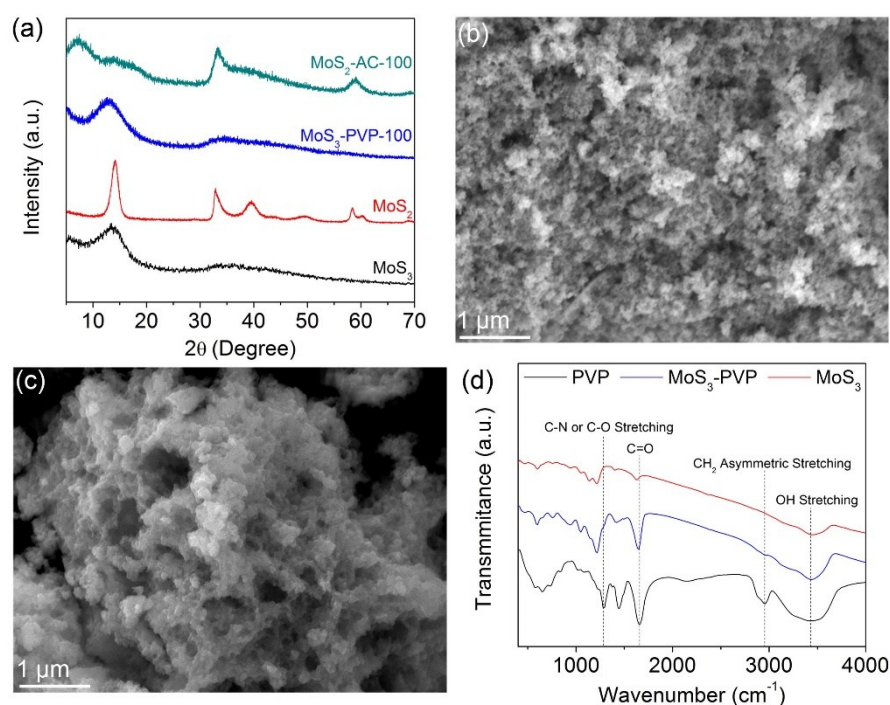

**Fig. S1** (a) XRD patterns of MoS<sub>3</sub> and MoS<sub>3</sub>-PVP, (b) SEM image of MoS<sub>3</sub>, (c) SEM image of MoS<sub>3</sub>-PVP, (d) FTIR spectrum of PVP, MoS<sub>3</sub>, MoS<sub>3</sub>-PVP. MoS<sub>3</sub>-PVP represents the precursor for MoS<sub>3</sub>-AC-100 sample. The XRD patterns of MoS<sub>3</sub> and MoS<sub>3</sub>-PVP show the typical profile of amorphous MoS<sub>3</sub>. MoS<sub>3</sub> and MoS<sub>3</sub>-PVP precursors display the granular morphology in nanosize.<sup>S1,S2</sup> The grain size of MoS<sub>3</sub>-PVP is slightly larger than that of MoS<sub>3</sub>, most likely due to PVP coating. The absorption peaks of FTIR from the chemical groups of PVP including C-N, C-O and CH<sub>2</sub> can be observed in MoS<sub>3</sub>-PVP samples prepared with additional PVP.<sup>S3</sup>

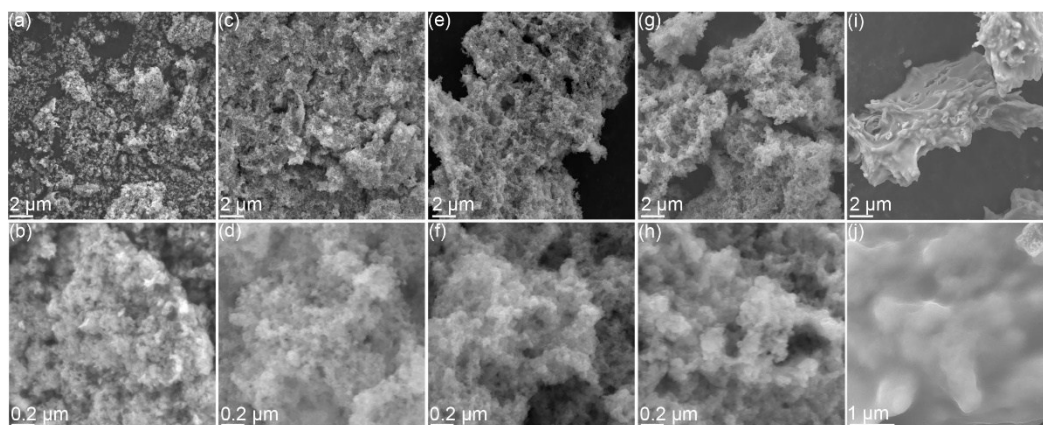

**Fig. S2** SEM images for morphology characterization. (a) and (b) for MoS<sub>2</sub>, (c) and (d) for MoS<sub>2</sub>-AC-20, (e) and (f) for MoS<sub>2</sub>-AC-50, (g) and (h) for MoS<sub>2</sub>-AC-100, (i) and (j) for MoS<sub>2</sub>-AC-200.

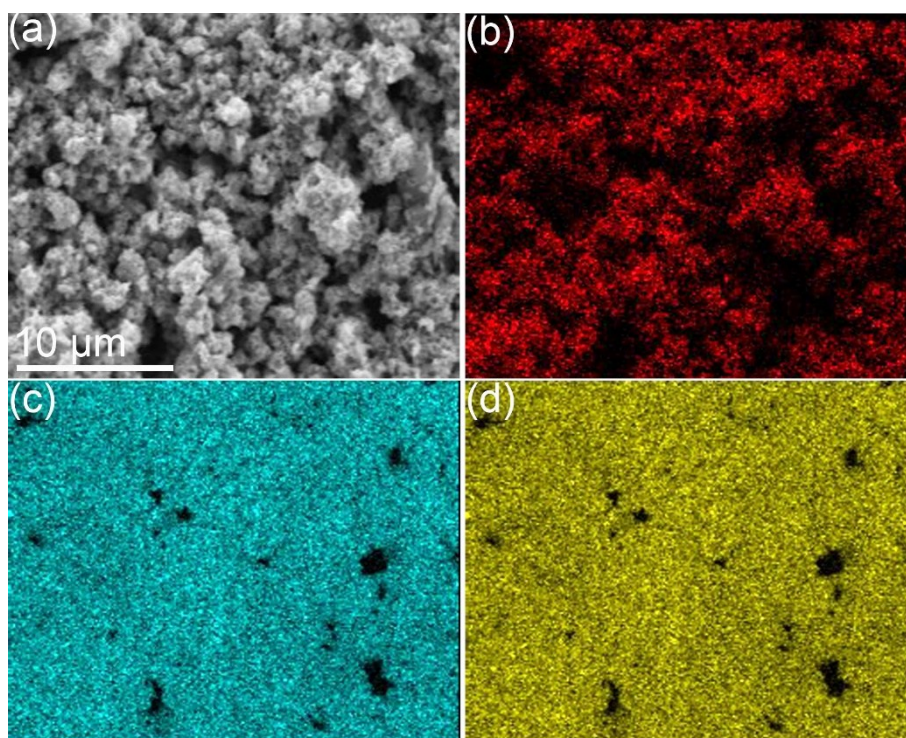

**Fig. S3** (a) SEM image of selected area for EDS test for MoS<sub>2</sub>-PVP-100 and the corresponding element mappings: (b) C element, (c) Mo element and (d) S element.

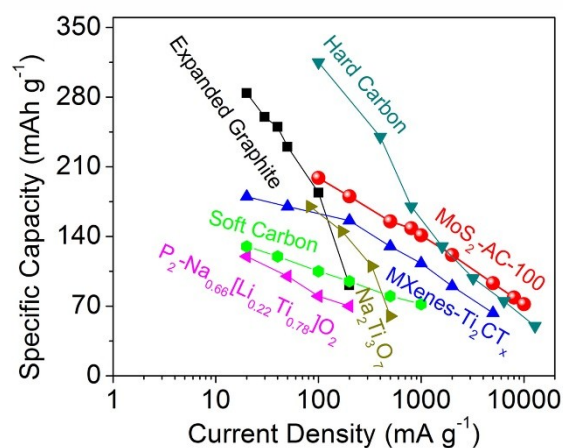

**Fig. S4** Rate capability for MoS<sub>2</sub>-AC compared to other intercalated anodes in reported literatures: hard carbon,<sup>S4</sup> MXenes,<sup>S5</sup> expanded graphite,<sup>S6</sup> Na<sub>2</sub>Ti<sub>3</sub>O<sub>7</sub>,<sup>S7</sup> P<sub>2</sub>-Na<sub>0.66</sub>Li<sub>0.22</sub>Ti<sub>0.78</sub>O<sub>2</sub>,<sup>S8</sup> and soft carbon.<sup>S9</sup>

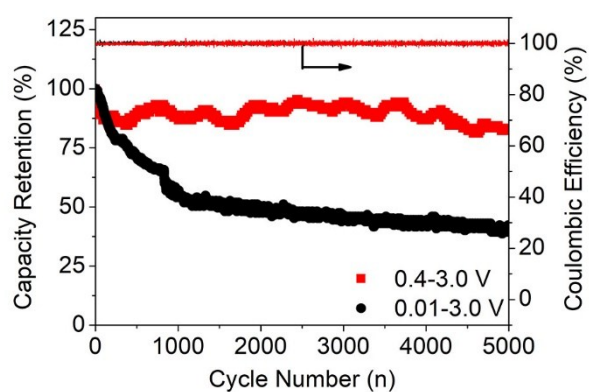

**Fig. S5** Long-term cycling performance of MoS<sub>2</sub>-AC-100 at a current density of 5 A g<sup>-1</sup> within two potential ranges of 0.4-3.0 V and 0.01-3.0 V.

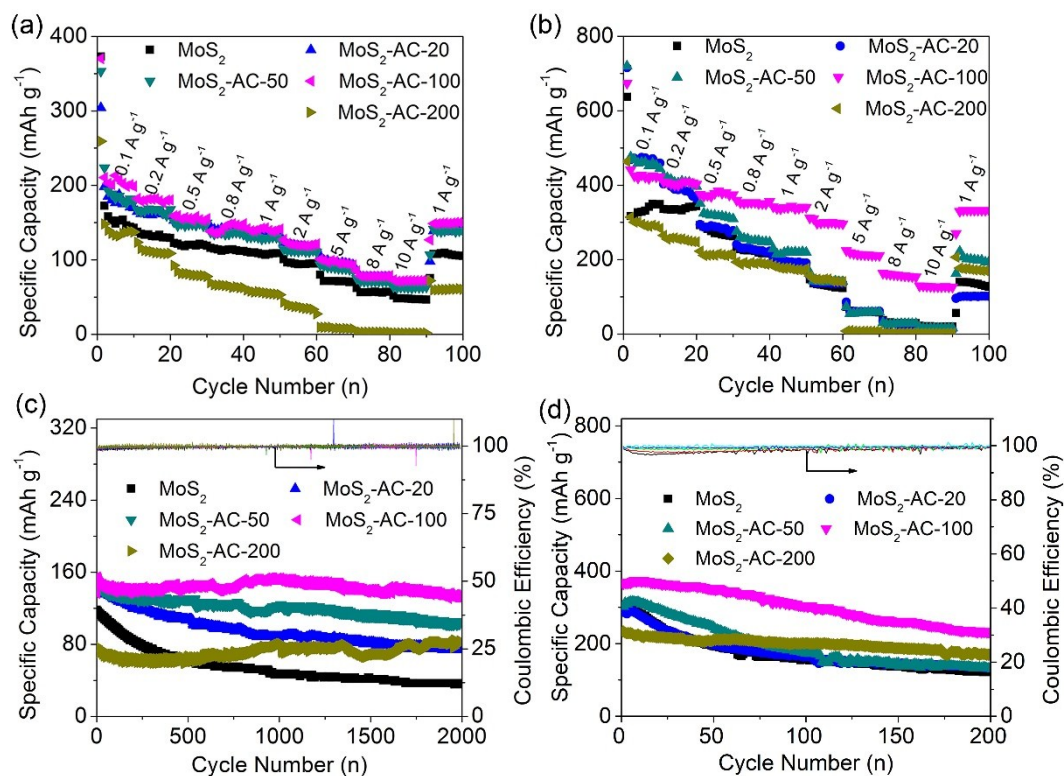

**Fig. S6** (a) Rate performance for MoS<sub>2</sub>-AC electrodes at various current densities from 0.1 to 10 A g<sup>-1</sup> within a working potential range of 0.4-3.0 V. (b) Rate performance for MoS<sub>2</sub>-AC electrodes at various current densities from 0.1 to 10 A g<sup>-1</sup> within a working potential range of 0.01-3.0 V. (c) and (d) Long-term cycling performance for MoS<sub>2</sub>-AC electrodes at 1 A g<sup>-1</sup> within two working potential ranges: 0.4-3.0 V and 0.01-3.0 V, respectively.



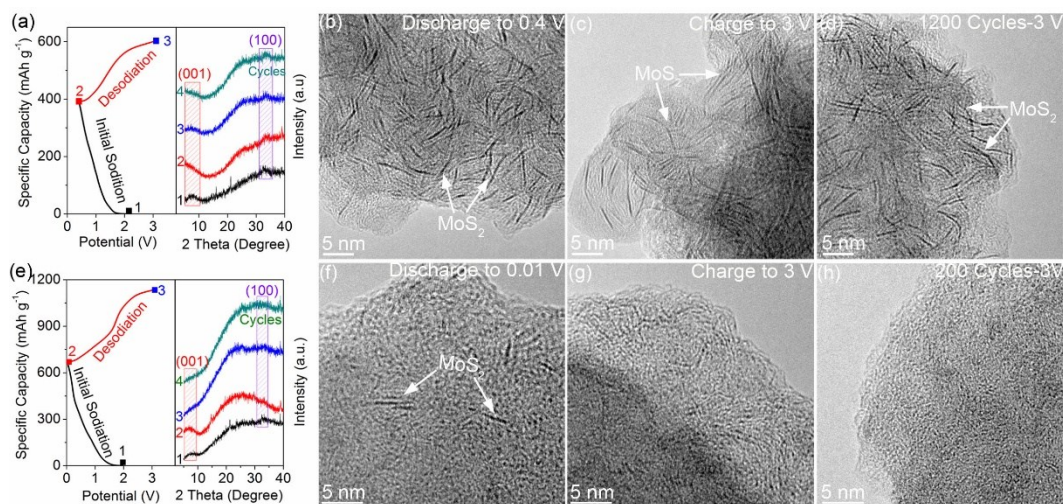

**Fig. S7** Initial charge/discharge process for MoS<sub>2</sub>-AC-100 at a current density of 0.1 A g<sup>-1</sup> and the corresponding ex-situ XRD patterns for MoS<sub>2</sub>-AC-100 during the cycles within two trade-off potentials: (a) 0.4 V and (e) 0.01 V. The notes: 1-pristine material, 2-initial sodiation, 3-initial desodiation. The note for 4 is the desodiated state after long cycles of 1200 cycles for (a) and 200 cycles for (b) at a current density of 1 A g<sup>-1</sup>. HRTEM images of MoS<sub>2</sub>-AC-100 sample cycled within 0.4-3.0 V: (b) the initial sodiation to 0.4 V (vs. Na/Na<sup>+</sup>), (c) initial desodiation to 3.0 V (vs. Na/Na<sup>+</sup>), (d) 1200<sup>th</sup> cycle to 3.0 V (vs. Na/Na<sup>+</sup>). HRTEM images of MoS<sub>2</sub>-AC-100 sample cycled within 0.01-3.0 V: (f) the initial sodiation to 0.01 V (vs. Na/Na<sup>+</sup>), (g) initial desodiation to 3.0 V (vs. Na/Na<sup>+</sup>), (h) 200<sup>th</sup> cycle to 3.0 V (vs. Na/Na<sup>+</sup>). The current density is 0.1 A g<sup>-1</sup>, except for 1 A g<sup>-1</sup> for long cycles for (d) and (h).

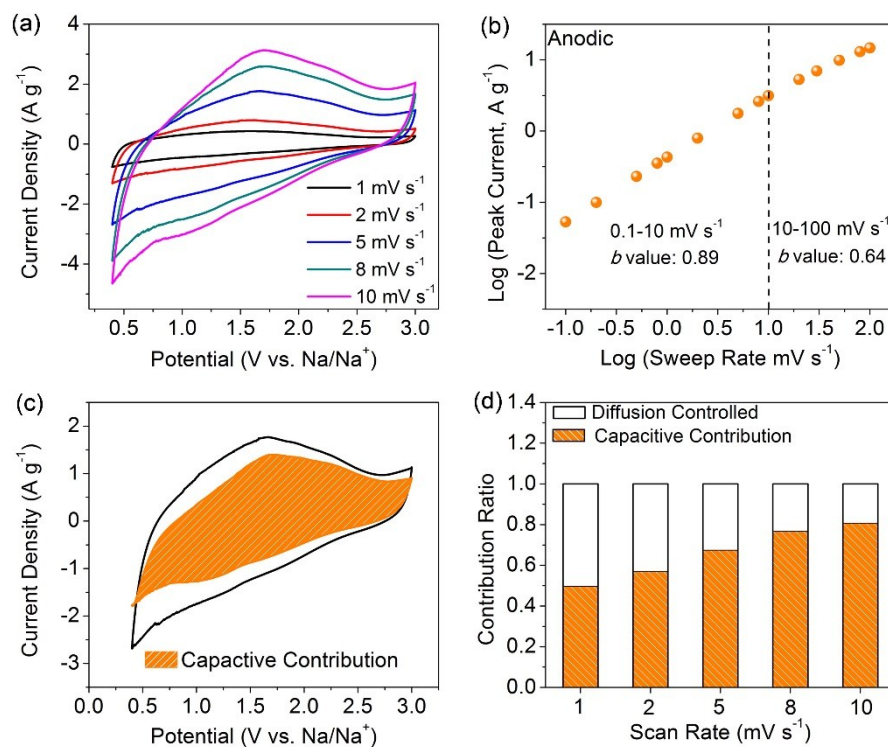

**Fig. S8** Electrochemical kinetics analysis of MoS<sub>2</sub>-AC-100 electrode. (a) CV curves at various scan rates from 1 to 10 mV s<sup>-1</sup>. (b) Determination of the *b*-value using the relationship between anodic peak current and scan rate. (c) Separation of the capacitive and diffusion currents at a scan rate of 5 mV s<sup>-1</sup>, respectively. (d) Contribution ratio of the capacitive charge versus scan rate.

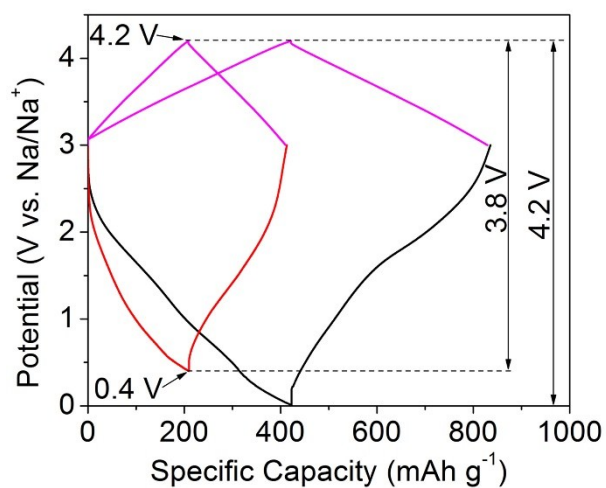

**Fig. S9** Charge/discharge curves of MoS<sub>2</sub>-AC-100 within two different potential windows (0.4-3.0 V (red line) and 0.01-3.0 V (black line)) and PDPC versus Na/Na<sup>+</sup>, respectively. The specific current density is 1 A g<sup>-1</sup>.

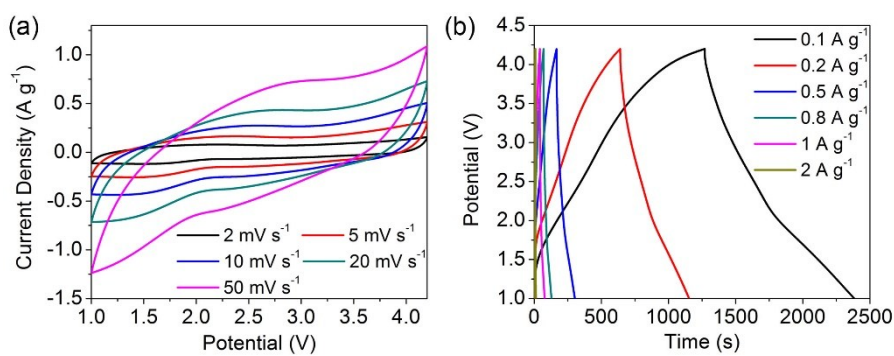

**Fig. S10** (a) CVs of as-fabricated MoS<sub>2</sub>-AC//PDPC-4.2 V at various scan rates from 2 to 50 mV s<sup>-1</sup>. (b) Charge/discharge curves of as-fabricated MoS<sub>2</sub>-AC//PDPC-4.2 V SIC at the different current densities from 0.1 to 2 A g<sup>-1</sup>.



## References

- S1 H. Ye, L. Wang, S. Deng, X. Zeng, K. Nie, P. N. Duchesne, B. Wang, S. Liu, J. Zhou, F. Zhao, N. Han, P. Zhang, J. Zhong, X. Sun, Y. Li, Y. Li and J. Lu, *Adv. Energy Mater.* 2016, **6**, 1601602.
- S2 W. Zhang, T. Zhou, J. Zheng, J. Hong, Y. Pan and R. Xu, *ChemSusChem* 2015, **8**, 1464-1471.
- S3 A. M. Abdelghany, M. S. Mekhail, E. M. Abdelrazek and M. M. Aboud, *J. Alloys Compd.* 2015, **646**, 326-332.
- S4 J. Ding, H. Wang, Z. Li, K. Cui, D. Karpuzov, X. Tan, A. Kohandehghan and D. Mitlin, *Energy Environ. Sci.* 2015, **8**, 941-955.
- S5 X. Wang, S. Kajiyama, H. Iinuma, E. Hosono, S. Oro, I. Moriguchi, M. Okubo and A. Yamada, *Nat. Commun.* 2015, **6**, 6544.
- S6 Y. Wen, K. He, Y. Zhu, F. Han, Y. Xu, I. Matsuda, Y. Ishii, J. Cumings and C. Wang, *Nat. Commun.* 2014, **5**, 4033.
- S7 A. Rudola, K. Saravanan, C. W. Masona and Palani Balaya, *J. Mater. Chem. A* 2013, **1**, 2653–2662.
- S8 Y. Wang, X. Yu, S. Xu, J. Bai, R. Xiao, Y. –S. Hu, H. Li, X. –Q. Yang, L. Chen and X. Huang, *Nat. Commun.* 2013, **4**, 2365.
- S9 W. Luo, Z. Jian, Z. Xing, W. Wang, C. Bommier, M. M. Lerner and X. Ji, *ACS Cent. Sci.* 2015, **1**, 516–522.
